# Supplementary material for: Factors Influencing Superimposition Error of 3D Cephalometric Landmarks by Plane Orientation Method Using 4 Reference Points: 4 Point Superimposition Error Regression Model
Source: PLoS One. 2014 Nov 5;9(11):e110665. doi: 10.1371/journal.pone.0110665 (PMC4220943; doi:10.1371/journal.pone.0110665)
Supplement: Table S3 — Coordinates before and after reorientation (Sample Number 3). (XLSX) [file pone.0110665.s003.xlsx]

## Sheet: Sheet1
Table S3. Coordinates before and after reorientation (Sample Number 3)
Landmarks	Coordinates	before reoirentation				after reorientation
		1st trial	2nd trial	3rd trial	average(m)	1st trial	2nd trial	3rd trial	average(m)
MLWS	x	72.025	72.2	72.2	72.1417	0	0	0	0
	y	106.52	106.44	106.48	106.48	0	0	0	0
	z	118.765	118.785	118.5	118.683	0	0	0	0
Na	x	68.05	68.56	68.58	68.3967	2.56	2.64	1.76	2.32
	y	48.99	49.23	48.89	49.0367	60.09	59.85	60.2	60.0467
	z	135.99	136.36	135.89	136.08	-2.07	-2.36	-2.09	-2.17333
S	x	69.86	69.99	70.7	70.1833	2.56	2.64	1.79	2.33
	y	108.94	108.7	108.84	108.827	-3.32	-3.32	-3.22	-3.28667
	z	115.41	115.11	115.29	115.27	-2.07	-2.36	-2.13	-2.18667
Ba	x	75.08	75.17	74.39	74.88	2.56	2.64	1.77	2.32333
	y	125.99	125.66	126.27	125.973	-32.83	-33.02	-32.93	-32.9267
	z	74.6	74.65	74.88	74.71	-35.42	-35.07	-34.81	-35.1
Ans	x	71	70.73	70.61	70.78	6.85	8.09	4.26	6.4
	y	34.61	34.4	34.6	34.5367	56.61	56.06	56.68	56.45
	z	83.62	83.75	83.58	83.65	-56.18	-56.66	-56.19	-56.3433
A	x	71.21	71.47	71.6	71.4267	7.38	8.13	3.97	6.49333
	y	37.52	37.29	37.49	37.4333	51.95	51.27	51.44	51.5533
	z	77.75	77.65	75.93	77.11	-60.75	-61.48	-62.53	-61.5867
Pns	x	73	72.68	72.68	72.7867	5.35	6.21	3.34	4.96667
	y	85.1	85.09	85.19	85.1267	5.71	5.04	5.65	5.46667
	z	74.02	74.07	73.91	74	-49	-48.91	-48.98	-48.9633
Pg	x	76.37	75.6	76.58	76.1833	9.97	11.99	4.11	8.69
	y	37.26	37.05	37.25	37.1867	33.51	31.93	33.34	32.9267
	z	20.56	19.78	20.15	20.1633	-115.06	-116.05	-115.57	-115.56
Me	x	76.06	75.79	76.96	76.27	11.38	12.81	4.35	9.51333
	y	43.01	42.13	42.78	42.64	24.98	24.37	25.28	24.8767
	z	11.08	11.53	11.23	11.28	-122.04	-122.04	-122.18	-122.087
Gn	x	76.06	76.01	77.21	76.4267	11.11	12.21	3.75	9.02333
	y	39.42	38.41	38.31	38.7133	29.18	29.01	30.7	29.63
	z	13.54	14.94	14.94	14.4733	-120.9	-120.15	-120.17	-120.407
B	x	74.69	75.52	75.35	75.1867	9.85	10.28	4.18	8.10333
	y	39.05	39.12	39.23	39.1333	35.95	34.22	35.19	35.12
	z	33.21	32.38	31.3	32.2967	-102.42	-103.6	-104.3	-103.44
OrR	x	30.3	31.06	32.22	31.1933	44.28	44.23	40.89	43.1333
	y	55.11	54.59	54.89	54.8633	44.64	44.41	45.19	44.7467
	z	102.9	102.94	103.26	103.033	-26.11	-26.53	-27.91	-26.85
OrL	x	108.84	107.56	109.14	108.513	-34.26	-32.22	-36.23	-34.2367
	y	53.1	52.46	52.63	52.73	46.13	46.52	46.49	46.38
	z	108.5	108.39	108.75	108.547	-31.83	-32.71	-29.74	-31.4267
PoR	x	23.56	22.55	21.61	22.5733	51.31	52.41	52.91	52.21
	y	129.37	128.92	128.61	128.967	-29.09	-29.38	-28.03	-28.8333
	z	91.45	91.04	91.3	91.2633	-11.78	-11.45	-14.29	-12.5067
PoL	x	128.54	128.88	129.57	128.997	-53.42	-53.61	-55.19	-54.0733
	y	124.95	124.78	126.12	125.283	-26.02	-25.86	-27.29	-26.39
	z	97.25	97.09	97.57	97.3033	-21.58	-21.85	-17.98	-20.47
CoR	x	20.29	19.63	19.97	19.9633	55.24	56.11	54.73	55.36
	y	113.09	113.31	113.27	113.223	-14.66	-15.63	-14.49	-14.9267
	z	88.2	88.03	88.17	88.1333	-19.69	-19.11	-22.1	-20.3
CoL	x	128.99	129.27	129.06	129.107	-53.41	-53.35	-54.62	-53.7933
	y	108.73	108.09	108.93	108.583	-11.18	-10.68	-11.65	-11.17
	z	95.75	95.5	95.66	95.6367	-28.32	-29.01	-25.35	-27.56
GoR	x	28.96	28.06	28.44	28.4867	54.35	55.7	51.23	53.76
	y	104.23	104.15	103.47	103.95	-24.8	-26.08	-23.84	-24.9067
	z	31.86	31.91	31.62	31.7967	-76.46	-75.64	-79.25	-77.1167
GoL	x	126.01	126.31	125.24	125.853	-43.31	-42.89	-46.12	-44.1067
	y	105.16	104.02	105.08	104.753	-24.97	-24.99	-25.23	-25.0633
	z	42.61	41.4	42.16	42.0567	-78.85	-80.37	-76.68	-78.6333
