# Supplementary material for: Factors Influencing Superimposition Error of 3D Cephalometric Landmarks by Plane Orientation Method Using 4 Reference Points: 4 Point Superimposition Error Regression Model
Source: PLoS One. 2014 Nov 5;9(11):e110665. doi: 10.1371/journal.pone.0110665 (PMC4220943; doi:10.1371/journal.pone.0110665)
Supplement: Table S6 — Coordinates before and after reorientation (Sample Number 6). (XLSX) [file pone.0110665.s006.xlsx]

## Sheet: Sheet1
Table S6. Coordinates before and after reorientation (Sample Number 6)
Landmarks	Coordinates	before reoirentation				after reorientation
		1st trial	2nd trial	3rd trial	average(m)	1st trial	2nd trial	3rd trial	average(m)
MLWS	x	75.74	75.675	75.91	75.775	0	0	0	0
	y	102.43	102.17	102.17	102.257	0	0	0	0
	z	124.855	124.985	125.01	124.95	0	0	0	0
Na	x	80.86	80.4	80.4	80.5533	0.03	0.11	0.56	0.233333
	y	39.79	39.51	39.43	39.5767	63.45	63.39	63.47	63.4367
	z	134.93	134.82	134.97	134.907	-4.99	-5.18	-5.11	-5.09333
S	x	75.58	75.45	75.32	75.45	0.03	0.11	0.58	0.24
	y	105.14	105.34	105.26	105.247	-4	-4.53	-4.47	-4.33333
	z	119.07	118.89	118.98	118.98	-4.99	-5.18	-5.11	-5.09333
Ba	x	74.49	74.66	75.32	74.8233	0.03	0.11	0.57	0.236667
	y	127.45	127.52	126.52	127.163	-35.8	-36.18	-35.14	-35.7067
	z	76.14	75.81	76.14	76.03	-41.47	-41.87	-41.8	-41.7133
Ans	x	82.22	82.5	83.17	82.63	0.2	-0.33	0.53	0.133333
	y	32.9	33.32	32.83	33.0167	58.39	57.75	58.18	58.1067
	z	84.56	84.55	84.46	84.5233	-55.6	-55.56	-55.85	-55.67
A	x	80.88	81.29	80.79	80.9867	1.34	0.75	2.9	1.66333
	y	35.67	35.61	35.49	35.59	55.09	54.84	54.12	54.6833
	z	82.43	81.99	78.89	81.1033	-56.97	-57.47	-60.49	-58.31
Pns	x	77.89	77.48	77.78	77.7167	0.17	0.59	1.53	0.763333
	y	84.44	84.45	84.17	84.3533	7.61	7.47	7.5	7.52667
	z	82.43	83.03	82.22	82.56	-45.5	-44.97	-45.82	-45.43
Pg	x	79.33	79.59	79.83	79.5833	4.15	3.97	6.49	4.87
	y	33.96	34	34.17	34.0433	42.36	42.05	41.5	41.97
	z	21.72	21.34	20.13	21.0633	-116.3	-116.71	-117.79	-116.933
Me	x	79.33	79.59	79.07	79.33	3.76	3.71	7.11	4.86
	y	41	40.24	40.36	40.5333	33.01	33.56	33.22	33.2633
	z	11.01	10.93	10.72	10.8867	-125.07	-125.38	-125.45	-125.3
Gn	x	79.33	79.8	79.3	79.4767	4.11	3.78	7.08	4.99
	y	36.1	35.58	35.95	35.8767	38.55	39.08	38.54	38.7233
	z	14.38	15.15	15.06	14.8633	-122.94	-122.37	-122.28	-122.53
B	x	79.55	79.5	79.4	79.4833	3.71	3.74	6.39	4.61333
	y	35.16	34.97	35.02	35.05	43.8	43.61	43.66	43.69
	z	32.63	32.03	32.93	32.53	-105.42	-106.09	-105.14	-105.55
OrR	x	44.34	46.18	46.07	45.53	36.39	34.26	35.33	35.3267
	y	45.62	46.1	45.63	45.7833	48.92	48.54	48.76	48.74
	z	109.27	109.41	108.9	109.193	-27.19	-26.94	-26.84	-26.99
OrL	x	110.87	111.85	113.15	111.957	-30.21	-31.44	-31.86	-31.17
	y	49.13	49.14	49.36	49.21	50.95	50.52	50.52	50.6633
	z	110.28	110.03	110.47	110.26	-27.91	-28.33	-28.63	-28.29
PoR	x	17.09	18.99	17.87	17.9833	57.09	55.35	56.97	56.47
	y	123.53	123.43	123.65	123.537	-30.74	-30.61	-30.97	-30.7733
	z	100.56	100.02	100.24	100.273	-16.46	-16.96	-15.5	-16.3067
PoL	x	132.91	132.59	132.42	132.64	-58.65	-58.24	-57.48	-58.1233
	y	127.34	127.75	127.81	127.633	-25.08	-26.02	-26.05	-25.7167
	z	101.84	101.99	102.05	101.96	-18.74	-18.79	-19.87	-19.1333
CoR	x	20.18	19.41	20.13	19.9067	55.67	56.53	56.61	56.27
	y	105.44	105.29	104.98	105.237	-14.56	-14.41	-14.21	-14.3933
	z	93.79	93.94	93.85	93.86	-27.37	-27.13	-26.16	-26.8867
CoL	x	132.68	132.89	133.67	133.08	-56.81	-56.93	-56.92	-56.8867
	y	109.81	109.5	110.04	109.783	-9.53	-9.78	-10.2	-9.83667
	z	95.81	95.87	95.85	95.8433	-28.68	-28.95	-30.07	-29.2333
GoR	x	27.61	27.11	27.89	27.5367	49.84	50.59	51.64	50.69
	y	98.32	98.55	98.79	98.5533	-19.3	-19.43	-19.83	-19.52
	z	41.91	42.3	42.02	42.0767	-79.73	-79.2	-78.39	-79.1067
GoL	x	128.62	128.73	128.55	128.633	-51.02	-50.78	-48.8	-50.2
	y	101.77	100.62	102.24	101.543	-15.13	-14.66	-15.97	-15.2533
	z	40.25	39.68	40.83	40.2533	-84.4	-85.45	-84.98	-84.9433
