# Supplementary material for: Factors Influencing Superimposition Error of 3D Cephalometric Landmarks by Plane Orientation Method Using 4 Reference Points: 4 Point Superimposition Error Regression Model
Source: PLoS One. 2014 Nov 5;9(11):e110665. doi: 10.1371/journal.pone.0110665 (PMC4220943; doi:10.1371/journal.pone.0110665)
Supplement: Table S12 — Coordinates before and after reorientation (Sample Number 12). (XLSX) [file pone.0110665.s012.xlsx]

## Sheet: Sheet1
Table S12. Coordinates before and after reorientation (Sample Number 12)
Landmarks	Coordinates	before reoirentation				after reorientation
		1st trial	2nd trial	3rd trial	average(m)	1st trial	2nd trial	3rd trial	average(m)
MLWS	x	74.595	74.635	74.64	74.6233	0	0	0	0
	y	111.75	111.87	111.81	111.81	0	0	0	0
	z	122.435	122.47	122.26	122.388	0	0	0	0
Na	x	76.08	76.02	76.14	76.08	-0.11	-0.62	0.22	-0.17
	y	48.87	49.01	49.01	48.9633	65.42	65.69	65.37	65.4933
	z	140.59	141.58	140.41	140.86	-2.63	-1.53	-1.47	-1.87667
S	x	74.56	75.13	74.33	74.6733	-0.11	-0.62	0.22	-0.17
	y	112.71	112.64	113.09	112.813	-1.88	-1.32	-1.82	-1.67333
	z	119.35	120.57	120.31	120.077	-2.63	-1.53	-1.48	-1.88
Ba	x	72.32	72.05	72.53	72.3	-0.11	-0.62	0.23	-0.166667
	y	131.06	131.29	131.77	131.373	-33.3	-33.33	-33.19	-33.2733
	z	75.13	75.1	75.13	75.12	-38.83	-38.94	-39.02	-38.93
Ans	x	73.98	74.36	74.08	74.14	-0.48	-3.04	0.76	-0.92
	y	37.67	38.13	37.78	37.86	58.94	58.72	59.96	59.2067
	z	86.55	86.45	86.66	86.5533	-57.47	-57.26	-56.15	-56.96
A	x	73.98	73.56	73.47	73.67	-0.68	-2.54	1.17	-0.683333
	y	39.46	39.39	39.58	39.4767	55.96	56.16	56.71	56.2767
	z	82.48	82.17	81.61	82.0867	-60.76	-60.97	-60.44	-60.7233
Pns	x	73.29	72.81	73.17	73.09	-0.69	-1.68	0.37	-0.666667
	y	90.59	90.66	90.76	90.67	5.56	5.77	6.29	5.87333
	z	76.52	76.72	76.26	76.5	-50.27	-50.1	-50.21	-50.1933
Pg	x	72.31	72.81	72.99	72.7033	-1.84	-6.02	-0.23	-2.69667
	y	41.37	41.27	41.2	41.28	35.25	35.81	37.88	36.3133
	z	22.76	22.97	23.85	23.1933	-116.83	-116.49	-115.05	-116.123
Me	x	71.47	71.66	72.07	71.7333	-1.43	-5.38	0.29	-2.17333
	y	45.78	44.74	46.22	45.58	28.45	30.12	30.26	29.61
	z	14.49	15.39	14.44	14.7733	-123.31	-122.65	-122.55	-122.837
Gn	x	72.11	72.57	72.84	72.5067	-1.9	-6.1	-0.28	-2.76
	y	42.38	42.12	42.14	42.2133	32.61	33.58	35.34	33.8433
	z	17.4	18.44	18.38	18.0733	-121.59	-120.52	-119.98	-120.697
B	x	72.79	73.06	72.97	72.94	-1.7	-5.24	0.14	-2.26667
	y	43.25	43.2	43.13	43.1933	37.78	38.37	39.69	38.6133
	z	36.39	36.98	36.08	36.4833	-103.29	-102.6	-102.81	-102.9
OrR	x	39.89	39.65	38.43	39.3233	34.57	33.47	36.87	34.97
	y	52.8	53.01	53.09	52.9667	51.28	51.55	51.54	51.4567
	z	110.18	110.16	110.59	110.31	-31.73	-32.6	-29.64	-31.3233
OrL	x	111.28	109.34	110.74	110.453	-36.79	-36.14	-35.47	-36.1333
	y	54.94	54.77	55.12	54.9433	50.58	50.44	51.13	50.7167
	z	109.32	108.98	109.17	109.157	-28.86	-28.21	-28.56	-28.5433
PoR	x	23.99	24.32	23.49	23.9333	49.26	48.63	50.02	49.3033
	y	129.52	129.66	129.26	129.48	-25.7	-25.12	-25.25	-25.3567
	z	98.02	98.33	98.11	98.1533	-19.66	-20.86	-19.09	-19.87
PoL	x	127.65	127.37	126.99	127.337	-54.43	-54.35	-53.56	-54.1133
	y	133.05	133	133.26	133.103	-27.47	-27.96	-27.02	-27.4833
	z	95.6	95.06	95.59	95.4167	-16.46	-15.57	-17.68	-16.57
CoR	x	17.42	17.42	17.6	17.48	55.83	55.21	56.09	55.71
	y	115.77	115.77	115.7	115.747	-13.43	-12.72	-13.1	-13.0833
	z	96.07	96.1	96.03	96.0667	-26.13	-27.82	-25.29	-26.4133
CoL	x	124.75	124.22	124.34	124.437	-51.48	-51.36	-50.74	-51.1933
	y	120.54	120.65	121.22	120.803	-16.02	-16.41	-16.01	-16.1467
	z	94.5	94.64	94.25	94.4633	-21.58	-20.06	-22.63	-21.4233
GoR	x	21.29	20.99	21.49	21.2567	49.18	47.42	50.35	48.9833
	y	110.33	110.47	110.17	110.323	-27.15	-26.15	-25.82	-26.3733
	z	35.94	37.15	35.48	36.19	-84.68	-85.01	-84.59	-84.76
GoL	x	119.4	118.86	118.66	118.973	-49.23	-50.86	-47.07	-49.0533
	y	113.08	112.95	112.62	112.883	-30.13	-30.23	-28.06	-29.4733
	z	27.74	27.46	27.02	27.4067	-87.44	-86.51	-89.47	-87.8067
