# Supplementary material for: Factors Influencing Superimposition Error of 3D Cephalometric Landmarks by Plane Orientation Method Using 4 Reference Points: 4 Point Superimposition Error Regression Model
Source: PLoS One. 2014 Nov 5;9(11):e110665. doi: 10.1371/journal.pone.0110665 (PMC4220943; doi:10.1371/journal.pone.0110665)
Supplement: Table S14 — Coordinates before and after reorientation (Sample Number 14). (XLSX) [file pone.0110665.s014.xlsx]

## Sheet: Sheet1
Table S14. Coordinates before and after reorientation (Sample Number 14)
Landmarks	Coordinates	before reoirentation				after reorientation
		1st trial	2nd trial	3rd trial	average(m)	1st trial	2nd trial	3rd trial	average(m)
MLWS	x	73.235	72.63	72.48	72.7817	0	0	0	0
	y	104.595	104.99	104.92	104.835	0	0	0	0
	z	122.78	122.51	122.5	122.597	0	0	0	0
Na	x	73.74	73.18	73.52	73.48	1.87	0.93	0.06	0.953333
	y	52.07	52.34	51.98	52.13	56.3	56.6	56.84	56.58
	z	143.15	143.34	143.18	143.223	0.25	0.96	-0.04	0.39
S	x	71.16	71.52	72.33	71.67	1.87	0.93	0.07	0.956667
	y	108.89	109.09	108.71	108.897	-4.67	-4.08	-4.09	-4.28
	z	121.17	121.91	120.97	121.35	0.25	0.96	-0.04	0.39
Ba	x	73.21	73.1	73.05	73.12	1.87	0.93	0.07	0.956667
	y	125.58	125.52	125.56	125.553	-34.43	-33.75	-34.07	-34.0833
	z	81.51	81.27	81.69	81.49	-30.9	-31.34	-30.51	-30.9167
Ans	x	73.36	73.2	73.54	73.3667	7.77	4.86	2.27	4.96667
	y	41.57	41.19	41.48	41.4133	45.8	47.18	46.15	46.3767
	z	86.9	87.14	87.01	87.0167	-55.69	-55.42	-56.13	-55.7467
A	x	73.36	72.92	73.36	73.2133	8.1	5.43	2.53	5.35333
	y	45.48	45.59	45.38	45.4833	39.46	39.99	39.85	39.7667
	z	79.41	78.43	79.7	79.18	-61.26	-61.99	-61.51	-61.5867
Pns	x	73.36	73.52	73.44	73.44	4.31	2.21	0.82	2.44667
	y	91	91.16	91.03	91.0633	-1.83	-1.08	-1.68	-1.53
	z	82.53	82.77	82.37	82.5567	-42.23	-42.02	-42.44	-42.23
Pg	x	75.53	75.32	75.67	75.5067	10.72	6.34	2.08	6.38
	y	51.52	51.74	51.58	51.6133	11.41	12.95	11.15	11.8367
	z	16.98	17.96	16.65	17.1967	-117.35	-116.47	-118.03	-117.283
Me	x	75.53	75.32	75.56	75.47	10.88	6.52	2.23	6.54333
	y	54.91	55.4	54.3	54.87	6.46	7.35	7.07	6.96
	z	11.99	11.8	12.41	12.0667	-120.78	-120.94	-120.98	-120.9
Gn	x	75.9	75.4	75.77	75.69	10.53	6.44	2.03	6.33333
	y	52.25	52.27	52.54	52.3533	9.78	11.27	9.31	10.12
	z	14.27	14.6	14.04	14.3033	-119.64	-119.43	-120.11	-119.727
B	x	75.32	75.52	75.39	75.41	10.31	5.07	1.73	5.70333
	y	53.74	53.88	53.98	53.8667	15.54	16.61	14.95	15.7
	z	34.28	34.01	33.21	33.8333	-100.36	-100.76	-101.74	-100.953
OrR	x	37.68	36.87	37.91	37.4867	40.13	38.91	36.61	38.55
	y	56.71	56.97	56.13	56.6033	38.47	39.38	39.97	39.2733
	z	109.89	109.65	109.39	109.643	-25.18	-26.18	-28.45	-26.6033
OrL	x	109.8	110.31	110.6	110.237	-31.68	-34.39	-36.09	-34.0533
	y	58.84	59.07	58.89	58.9333	39.46	39.32	38.67	39.15
	z	109.68	109.34	108.98	109.333	-32.27	-31.19	-30.94	-31.4667
PoR	x	18.34	18.76	18.5	18.5333	54.43	53.71	53.86	54
	y	125.7	125.71	124.89	125.433	-28.56	-27.25	-26.37	-27.3933
	z	104.54	104.38	104.04	104.32	-3.64	-5.68	-7.62	-5.64667
PoL	x	131.94	131.52	132.01	131.823	-58.61	-58.84	-59.64	-59.03
	y	128.89	129.51	128.45	128.95	-27	-28.03	-27.61	-27.5467
	z	103.81	103.51	103.68	103.667	-15.24	-13.53	-11.51	-13.4267
CoR	x	19.78	19.54	19.35	19.5567	54.41	53.87	53.57	53.95
	y	111.11	111.5	110.74	111.117	-16.1	-15.13	-14.27	-15.1667
	z	101.24	101.04	101.07	101.117	-12.03	-13.82	-15.56	-13.8033
CoL	x	128.27	128.28	128.34	128.297	-53.92	-54.87	-55.53	-54.7733
	y	116.89	116.72	116.59	116.733	-16.46	-16.62	-17.17	-16.75
	z	102.44	102.2	102.22	102.287	-20.38	-19	-17.03	-18.8033
GoR	x	26.35	26.77	26.42	26.5133	52.27	49.99	48.26	50.1733
	y	118.36	117.52	117.74	117.873	-43.8	-42.02	-42.54	-42.7867
	z	42.35	40.3	41.03	41.2267	-64.87	-68.95	-69.17	-67.6633
GoL	x	119.97	120.1	119.5	119.857	-41.07	-43.42	-44.86	-43.1167
	y	120.1	119.75	119.42	119.757	-40.64	-40.02	-41.31	-40.6567
	z	44.63	44.6	43.67	44.3	-72.06	-71.1	-70.12	-71.0933
